# Supplementary material for: Site-specific methylation and acetylation of lysine residues in the C-terminal domain (CTD) of RNA polymerase II
Source: PubMed Central journal article supplement — Transcription. 2015 Nov 13;6(5):91–101. doi: 10.1080/21541264.2015.1114983 (PMC4802791; doi:10.1080/21541264.2015.1114983), 2015-11-13
Supplement: ktrn-06-05-1114983-s001.pdf [file ktrn-06-05-1114983-s001.pdf]

# Supplementary data

## Site-specific methylation and acetylation of lysine residues in the C-terminal domain (CTD) of RNA polymerase II

**Kirsten Voss<sup>1</sup>, Ignasi Forné<sup>2</sup>, Nicolas Descostes<sup>3</sup>, Corinna Hintermair<sup>1</sup>, , Roland Schüller<sup>1</sup>, Muhammad Ahmad Maqbool<sup>6</sup>, Martin Heidemann<sup>1</sup>, Andrew Flatley<sup>4</sup>, Axel Imhof<sup>3</sup>, Marta Gut<sup>5</sup>, Ivo Gut<sup>5</sup>, Elisabeth Kremmer<sup>4</sup>, Jean-Christophe Andrau<sup>6</sup> and Dirk Eick<sup>1,7</sup>**

*<sup>1</sup>Department of Molecular Epigenetics, Helmholtz Center Munich, Center for Integrated Protein Science Munich, Marchioninstr. 25, 81377 Munich, Germany.*

*<sup>2</sup>Biomedical Center Munich, Ludwig Maximilians University Munich, Großhaderner Strasse 9, 82152 Planegg-Martinsried, Germany.*

*<sup>3</sup>Centre d'Immunologie de Marseille-Luminy, Université Aix-Marseille, Campus de Luminy, France.*

*<sup>4</sup>Institute of Molecular Immunology, Helmholtz Center Munich, Marchioninstr. 25, 81377 Munich, Germany.*

*<sup>5</sup>Centre Nacional D'Anàlisi Genòmica, Parc Científic de Barcelona, Barcelona, Spain.*

*<sup>6</sup>Institute of Molecular Genetics of Montpellier (IGMM), UMR5535 CNRS, 34293, Montpellier, France.*

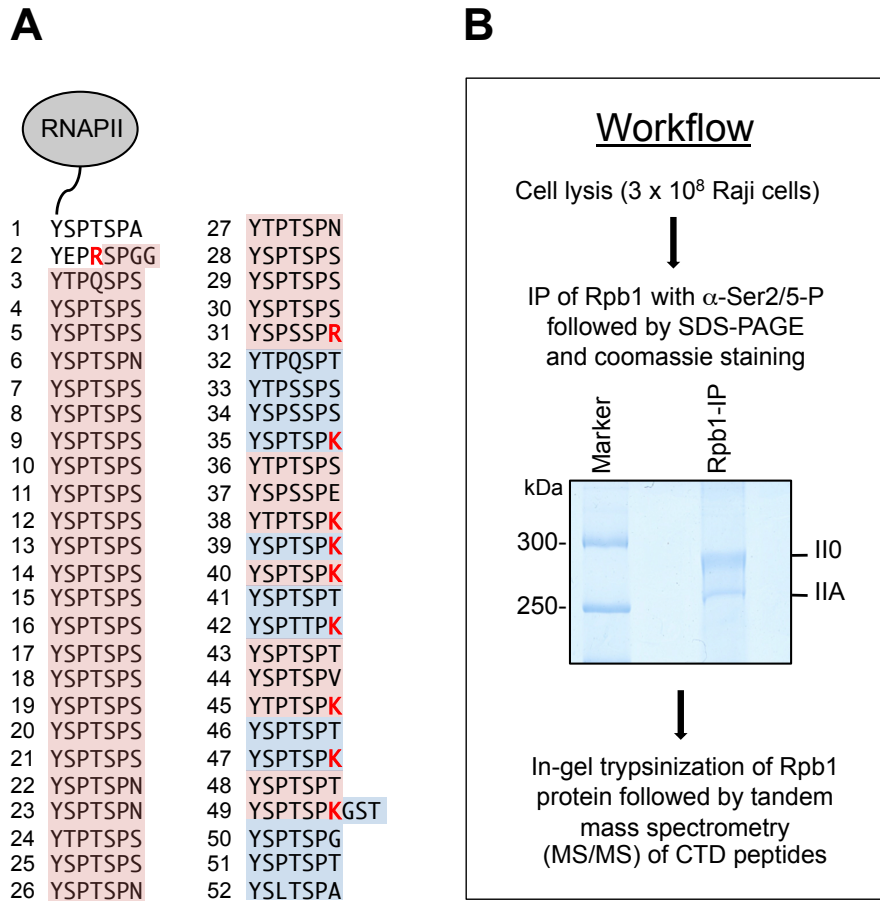

Amino acid composition of human RNAPII CTD and purification of RNAPII.

(A) Human CTD is composed of 52 consensus and non-consensus heptad repeats. Peptides of CTD after tryptic digestion are marked by red and blue boxes, basic amino acids by red letters.

(B) Purification scheme of RNAPII large subunit Rpb1.

Figure S1

# YSPTSpPKacYSPTSPK

| Peptide Summary             |                        |                 |                         |                |                |                 |                 |    |  |
|-----------------------------|------------------------|-----------------|-------------------------|----------------|----------------|-----------------|-----------------|----|--|
| Fragment Matches            |                        |                 |                         |                |                |                 |                 |    |  |
| Value Type: Theo. Mass [Da] |                        |                 |                         |                |                |                 |                 |    |  |
| Ion Series                  | Phosphorylation Losses | Neutral Losses  | Multiple Neutral Losses | Precursor Ions |                |                 |                 |    |  |
| #1                          | b <sup>+</sup>         | b <sup>2+</sup> | b <sup>3+</sup>         | Seq.           | y <sup>+</sup> | y <sup>2+</sup> | y <sup>3+</sup> | #2 |  |
| 1                           | 164.07060              | 82.53894        | 55.36172                | Y              |                |                 |                 | 14 |  |
| 2                           | 251.10263              | 126.05495       | 84.37239                | S              | 1498.68256     | 749.84492       | 500.23237       | 13 |  |
| 3                           | 348.15540              | 174.58134       | 116.72332               | P              | 1411.65053     | 706.32890       | 471.22169       | 12 |  |
| 4                           | 449.20308              | 225.10518       | 150.40588               | T              | 1314.59776     | 657.80252       | 438.87077       | 11 |  |
| 5                           | 616.20144              | 308.60436       | 206.07200               | S-Phospho      | 1213.55008     | 607.27868       | 405.18821       | 10 |  |
| 6                           | 713.25421              | 357.13074       | 238.42292               | P              | 1046.55172     | 523.77950       | 349.52209       | 9  |  |
| 7                           | 883.35974              | 442.18351       | 295.12477               | K-Acetyl       | 949.49895      | 475.25311       | 317.17117       | 8  |  |
| 8                           | 1046.42306             | 523.71517       | 349.47921               | Y              | 779.39341      | 390.20034       | 260.46932       | 7  |  |
| 9                           | 1133.45509             | 567.23118       | 378.48988               | S              | 616.33009      | 308.66868       | 206.11488       | 6  |  |
| 10                          | 1230.50786             | 615.75757       | 410.84081               | P              | 529.29806      | 265.15267       | 177.10420       | 5  |  |
| 11                          | 1331.55554             | 666.28141       | 444.52337               | T              | 432.24529      | 216.62628       | 144.75328       | 4  |  |
| 12                          | 1418.58757             | 709.79742       | 473.53404               | S              | 331.19761      | 166.10244       | 111.07072       | 3  |  |
| 13                          | 1515.64034             | 758.32381       | 505.88497               | P              | 244.16558      | 122.58643       | 82.06004        | 2  |  |
| 14                          |                        |                 |                         | K              | 147.11281      | 74.06004        | 49.70912        | 1  |  |

## Fragment Spectrum

Extracted from: E:\Discoverer\IgnasiRSchuller\_Final\_Sample\_Set\_Feb\_2013\WTrec\WT\_2\_Yst\_Pol\_IJA.RAW #2735 RT: 67.56  
 ITMS, CID@35.00, z=+3, Mono m/z=554.59113 Da, MH+=1661.75882 Da, Match Tol.=0.6 Da

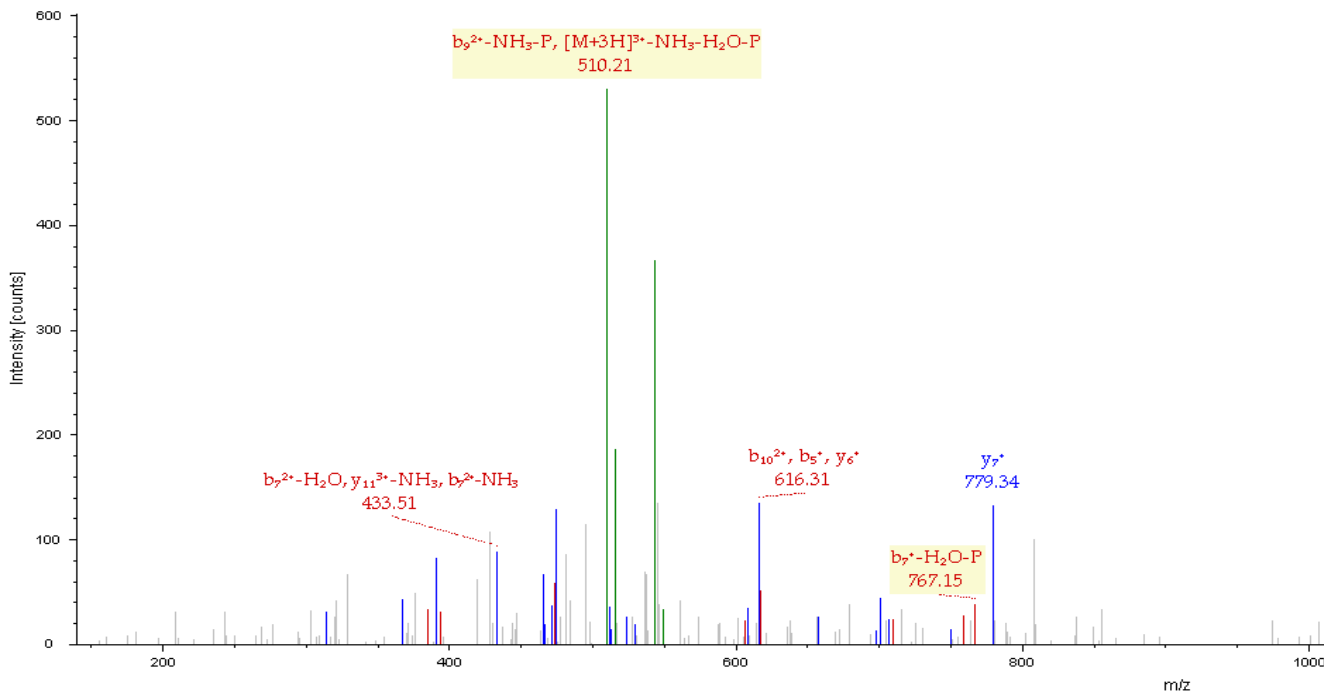

MS/MS spectrum of peptide with heptad-repeats 39-40

Figure S2

YSPTSpPKacYSPTSPKme<sub>1</sub>

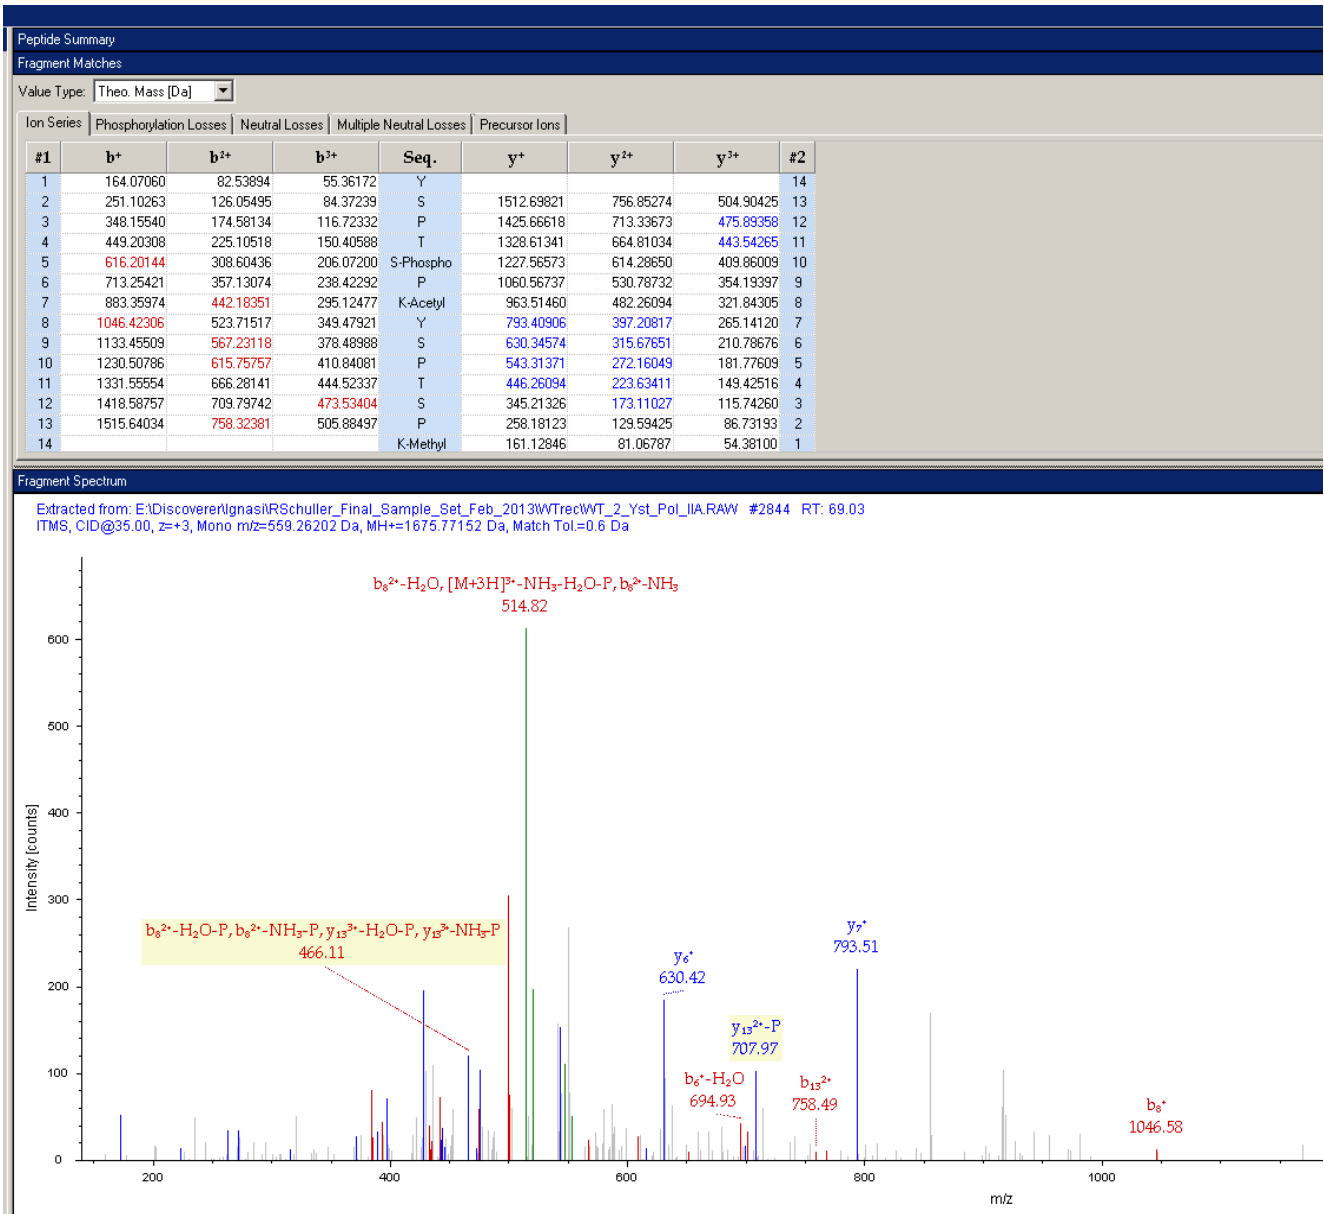

MS/MS spectrum of peptide with heptad-repeats 39-40

Figure S3

# YSPT<sub>p</sub>SPKme<sub>1</sub>YSPTSpPTYS<sub>p</sub>PTTPK

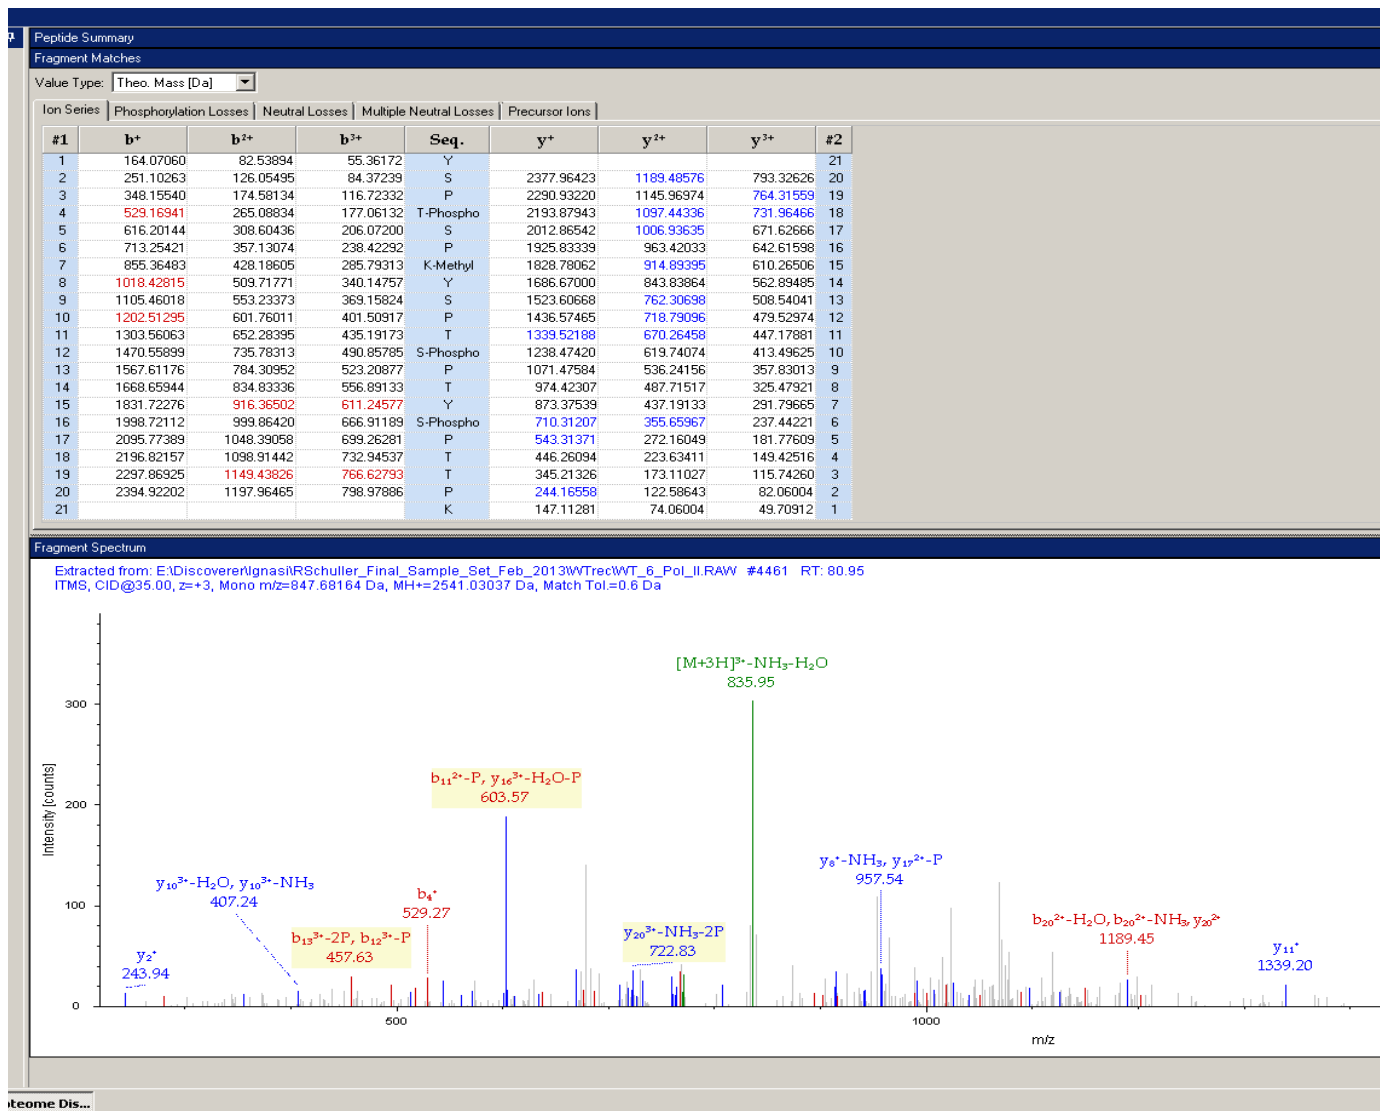

MS/MS spectrum of peptide with heptad-repeats 40-42

Figure S4

# YSPT<sub>p</sub>SPTYSP<sub>T</sub>TPKme<sub>1</sub>

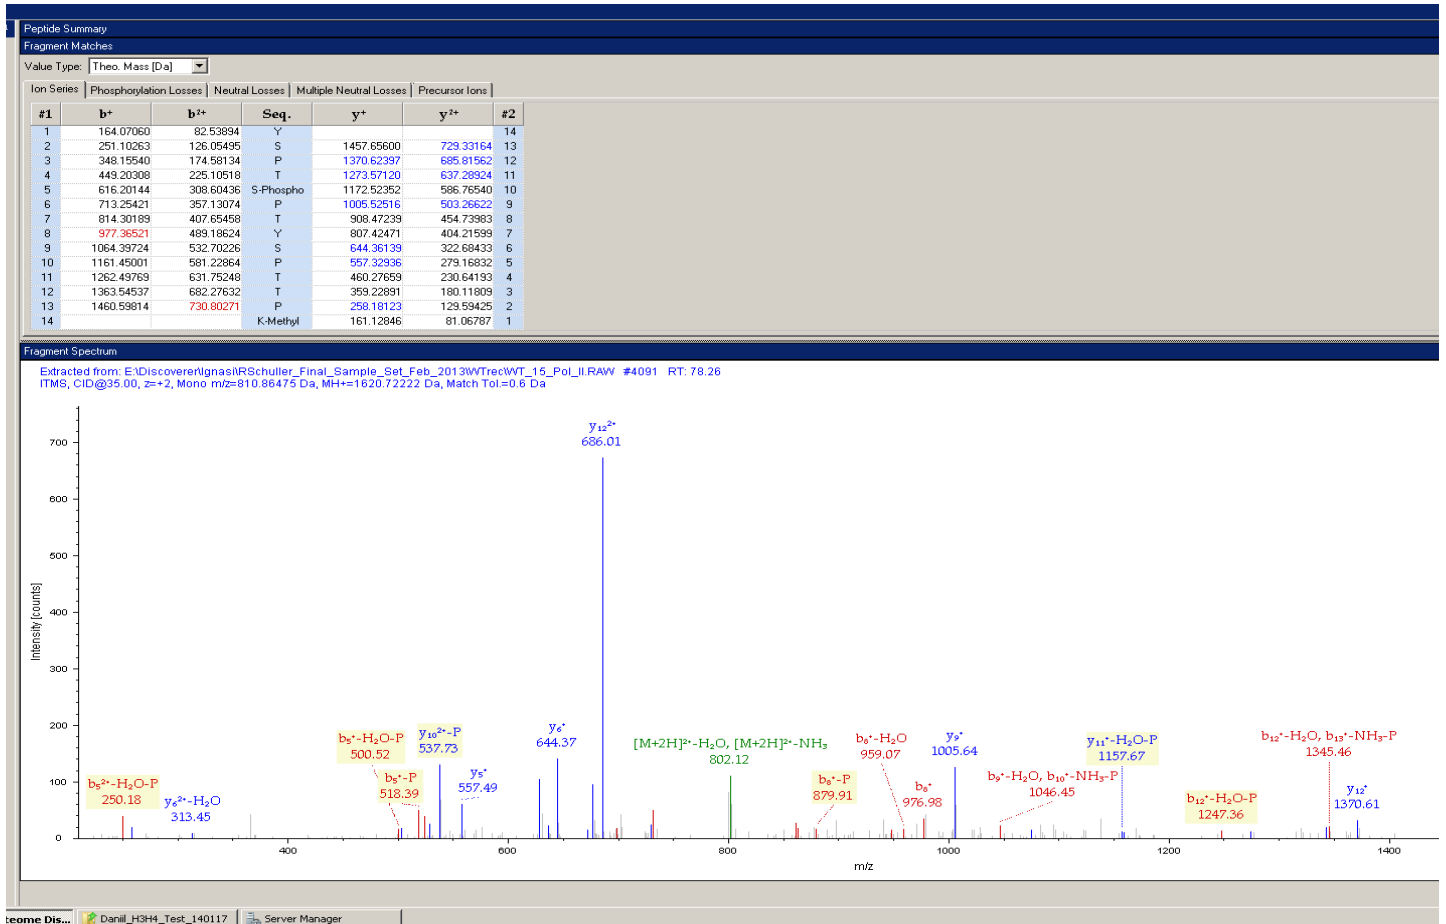

MS/MS spectrum of peptide with heptad-repeats 41-42

Figure S5

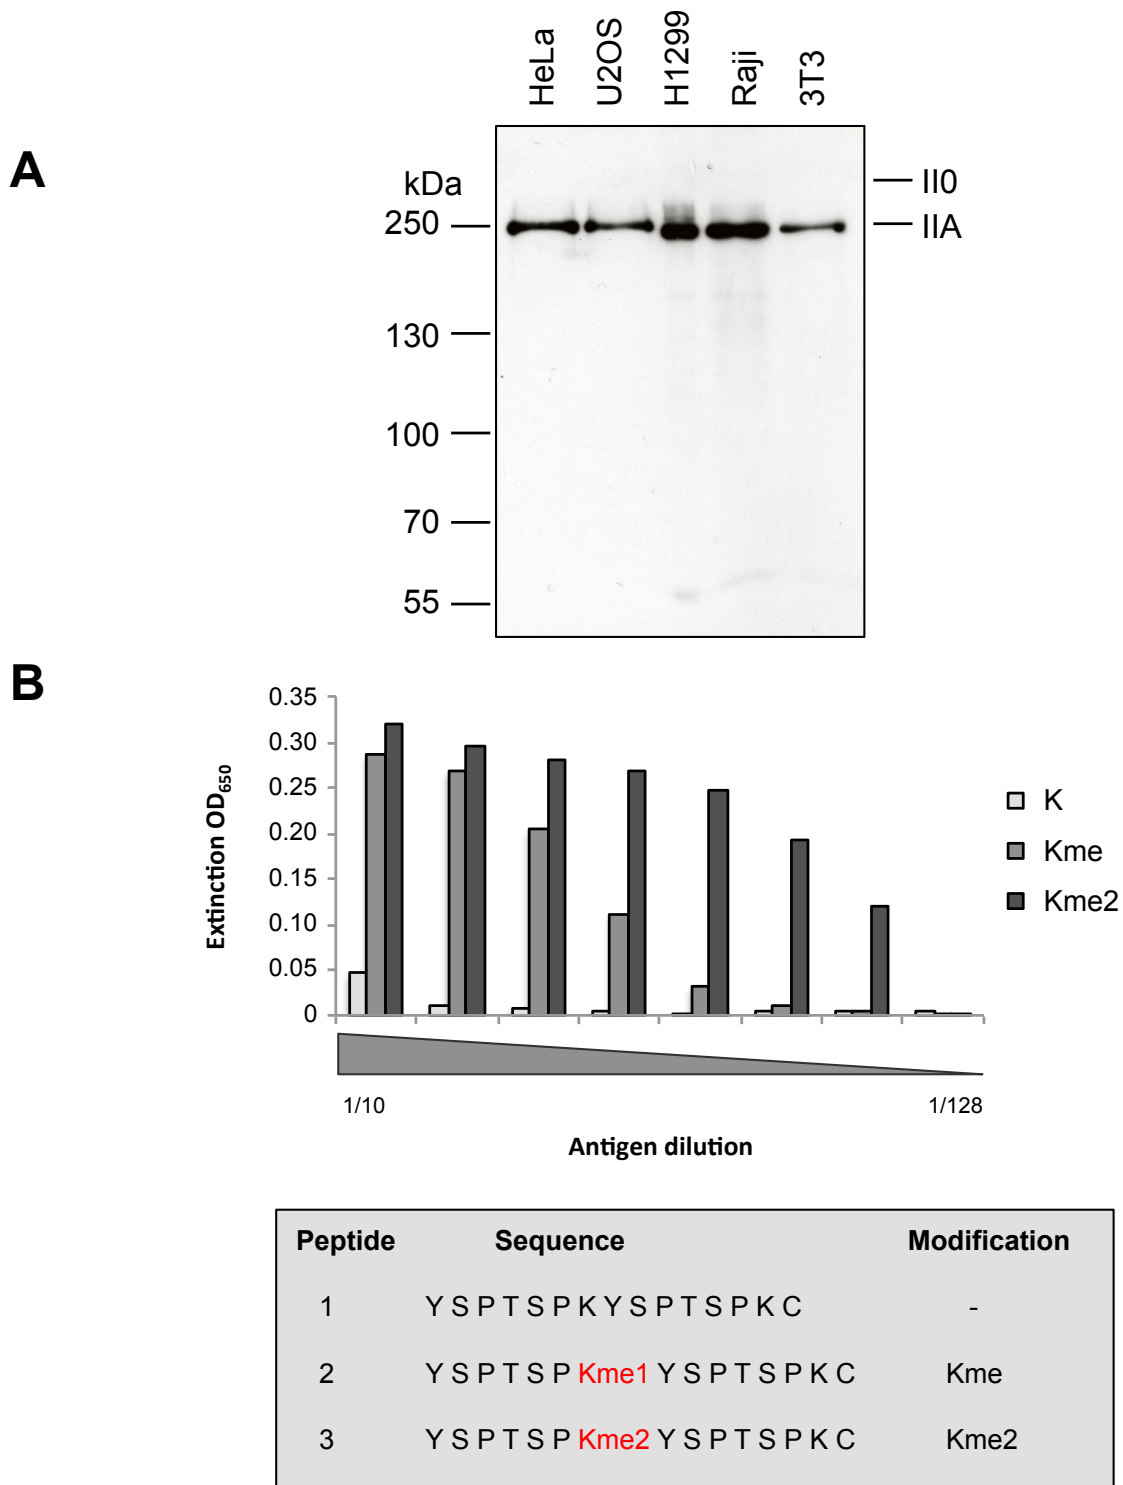

(A) Reactivity of mAb 1F5 for RNAPII in cellular extracts of human cell lines HeLa, U2OS, H1299, and Raji, and mouse cell line NIH3T3.

(B) Titration of the specificity of mAb 1F5 for K7me1 and K7me2 epitopes in ELISA using synthetic di-heptad peptides with the corresponding modification.

Figure S6

| Peptide | Sequence                                                                                       | Modification      |
|---------|------------------------------------------------------------------------------------------------|-------------------|
| 1       | TSPSYSPTSPKYSPTSPS-PEG-Biotin                                                                  | -                 |
| 2       | TSPSYSPTSP <b>K<sub>me2</sub></b> YSPTSPS-PEG-Biotin                                           | Kme2              |
| 3       | TSPSYSPT <b>S<sub>p</sub></b> PKYSPTSPS-PEG-Biotin                                             | Ser5P             |
| 4       | TSPSYSPT <b>S<sub>p</sub></b> P <b>K<sub>me2</sub></b> YSPTSPS-PEG-Biotin                      | Ser5P, Kme2       |
| 5       | TSPSYSPTSPKY <b>S<sub>p</sub></b> PTSPS-PEG-Biotin                                             | Ser2P             |
| 6       | TSPSYSPTSP <b>K<sub>me2</sub></b> Y <b>S<sub>p</sub></b> PTSPS-PEG-Biotin                      | Kme2, Ser2P       |
| 7       | TSPSYSPT <b>S<sub>p</sub></b> PKY <b>S<sub>p</sub></b> PTSPS-PEG-Biotin                        | Ser2P/Ser5P       |
| 8       | TSPSYSPT <b>S<sub>p</sub></b> P <b>K<sub>me2</sub></b> Y <b>S<sub>p</sub></b> PTSPS-PEG-Biotin | Ser2P/Ser5P, Kme2 |

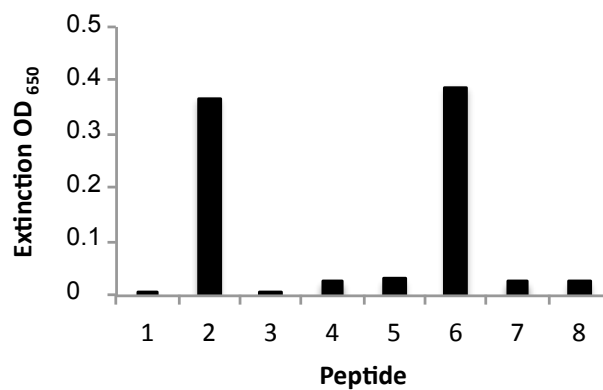

Phosphorylation of adjacent amino acids (red) can inhibit reactivity of mAb 1F5. ELISA experiment.

Figure S7



**A**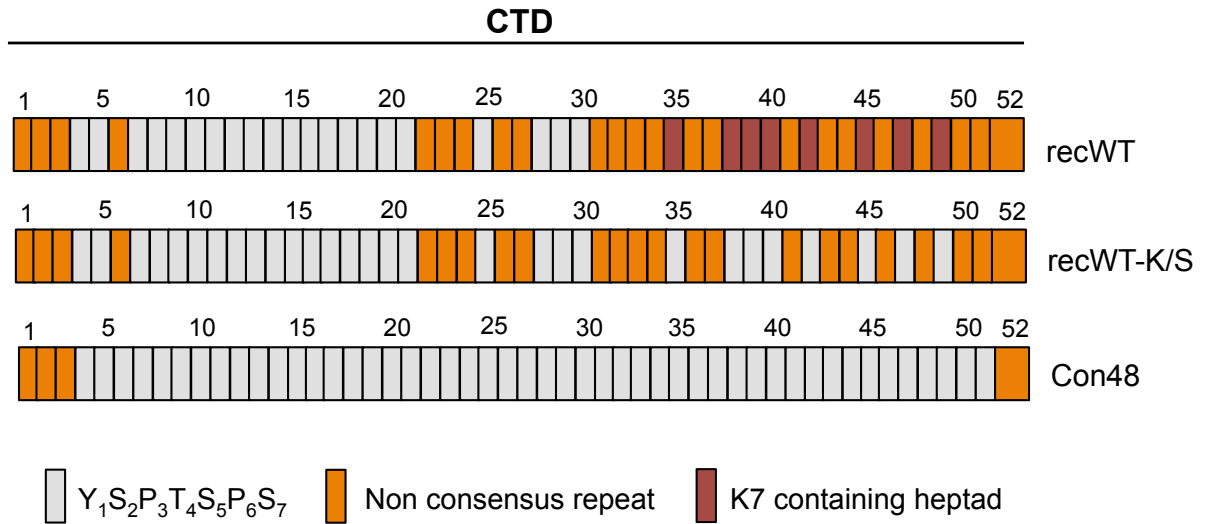**B**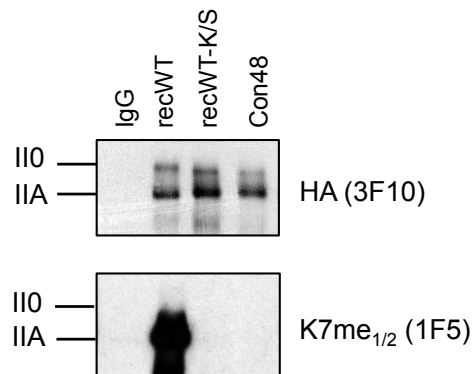

Recognition of RNAPII by mAb 1F5 requires CTD K7 residues.  
 (A) recWT: wild-type CTD; recWT-K/S: K7 containing heptads were replaced by consensus repeats; Con48, CTD with 48 consensus repeats.  
 (B) Western analysis of RNAPII mutants with mAb 1F5.

Figure S8
